# Supplementary material for: Functional evolution of the vitamin D and pregnane X receptors
Source: PubMed Central journal article supplement (PMC2263054; doi:10.1186/1471-2148-7-222), 2007-11-12
Supplement: 1471-2148-7-222-S1.pdf [file 1471-2148-7-222-S1.pdf]

## A. DNA-binding domain

|               |                                                              |
|---------------|--------------------------------------------------------------|
| PXR_human     | QICRVCGDKATGYHFNVMTCEGCKGFFRRAMKRNARLRCPFKRGACEITRKTRRQCQACR |
| PXR_chicken   | KVCAVCGDRATGYHFHVMSCGCKGFFRRSILKGVHFTCPF-TRSCPITKAKRRQCQACR  |
| PXR_fugu      | RACGVCGDQAKGYHFNAWTCEGCKGFFRAIKRTPPLPCQF-LNKCSITKKNRRQCQDCR  |
| VDR_human     | RICGVCGDRATGFHFNAMTCEGCKGFFRRSMKRKALFTCPFN-GDCRITKDNRRHCQACR |
| VDR_mouse     | RICGVCGDRATGFHFNAMTCEGCKGFFRRSMKRKALFTCPFN-GDCRITKDNRRHCQACR |
| VDR_x_laevis  | RICGVCGDKATGFHFNAMTCEGCKGFFRRSMKRKAMFTCPFN-GDCRITKDNRRHCQSCR |
| VDR_zebrafish | PICGVCGDKATGFHFNAMTCEGCKGFFRRSMKRKASFTCPFN-GNCTITKDNRRHCQACR |
| VDR_lamprey   | KVCGVCGDKATGYHFNAMTCEGCKGFFRRSMKRKASFTCPFE-GKCNITKDNRRHCQACR |
| VDR_PXR_Ciona | -----MHFGAITCEGCKGFFRRSVKKNASFSCAF-EKKCEINKNNRKHQCQACR       |
| CAR_human     | RNCVVCGDQATGYHFNALTCEGCKGFFRRTVSKSIGPTCPF-AGSCEVSKTQRRHCPACR |

|               |           |
|---------------|-----------|
| PXR_human     | LRKCLESGM |
| PXR_chicken   | LQKCLDVGM |
| PXR_fugu      | LRKCQAIGM |
| VDR_human     | LKRCVDIGM |
| VDR_mouse     | LKRCVDIGM |
| VDR_x_laevis  | LKRCVDIGM |
| VDR_zebrafish | LKRCIDIGM |
| VDR_lamprey   | LKRCRDIGM |
| VDR_PXR_Ciona | FNACLAAGM |
| CAR_human     | LQKCLDAGM |

## B. Ligand-binding domain

|               |     |                                                                |  |
|---------------|-----|----------------------------------------------------------------|--|
|               |     | <u><b>Helix-1</b></u>                                          |  |
| PXR_human     | 141 | QGLTEEQRMMIRELMDAQMKTFTDFTTSHFKNFRLPGVLSGGCELPELQAP-SREEA-AK   |  |
| PXR_chicken   |     | GGLTAEQQELISILIAAHKRTFDSSFSQFQHYQPAVRLC----IPGPCSQS-PPGPG-VP   |  |
| PXR_fugu      |     | IHLSSQQEETIRELLYGHRKTFDLEFYRFSSFRVRTSTTLFDLSKLSERL-NIFAV-RG    |  |
| VDR_human     | 118 | PKLSEEQQRIIAAILLDAHHTYDPTYSDFCQFRPPVRVNDGGGSHPSRPNRHTPSF-SG    |  |
| VDR_mouse     |     | PKLSEEQQHIIAAILLDAHHTYDPTYADFRDFRPPPIRADVSTGYSYSPR-----TLSF-SG |  |
| VDR_x_laevis  |     | PKISDEQQKMIDILLEAHRKTFDFTTYSDFNKFPPVRENVDPFRITRSSSVHTQGSPSE    |  |
| VDR_zebrafish |     | PRLSDEQMQUIINSLVEAHHKTYDSDYSDFVFRPPVREGPVTRSASRAASLHSLSDA-SS   |  |
| VDR_lamprey   |     | PQLLEEQRERLIATLIEAHRKTYDASYSDFSQFRPPKRGDGSPECRNATNPFMLSLLN-SD  |  |
| VDR_PXR_Ciona |     | TRMTMDEKLLVKTLKGRDSDYDFAYVEYDTFRGREDGQOEIGNNTENPNG---LDA-AT    |  |
| CAR_human     | 103 | VQLSKEQEELIRTLGATHRMGMTMFEQFVQFRPPAHLFIHHQPL-----              |  |

|               |     |                                                              |                       |
|---------------|-----|--------------------------------------------------------------|-----------------------|
|               |     |                                                              | <u><b>Helix-3</b></u> |
| PXR_human     | 199 | WSQVRKDLCSLKVSLQL-RGEDGSVWNYKPP-----ADSGGKEIFSLPHMADMSTYMFK  |                       |
| PXR_chicken   |     | SASLSPQLDCLDEDVL-----PDVFSILPHFADLSTFMIQ                     |                       |
| PXR_fugu      |     | SSPSGPASSDV--SSLS-TSARLRGRPETPQTQGGENARRGC-VFTALPHVTDLATCMIH |                       |
| VDR_human     | 181 | DSSSSCDHCITSSDM-MDSSSFSNLDLSEEDSDDPVTLLELSQLSMLPHLADLVSYSIQ  |                       |
| VDR_mouse     |     | DSSSNS-DLYTPSLDM-MEPASFSTMDLNEEGSDDPSVTLDLSPLSMLPHLADLVSYSIQ |                       |
| VDR_x_laevis  |     | DSDVFTSSPDSSEHGFFSASLFGQFEYSSMGGKSGELS-----MLPHIADLVSYSIQ    |                       |
| VDR_zebrafish |     | DSFNHSPESVDTKLNFSNLLMMYQDSG-SPDSSEEDQQS----RLSMLPHLADLVSYSIQ |                       |
| VDR_lamprey   |     | MD-----ELPKASASGAEAAAGDELSMLPHLADLVSYSIQ                     |                       |
| VDR_PXR_Ciona |     | AVEAQSTTEDSGKQLHL-MLLFQHFLPIYP-----FSFDPKA-QQLFQHFCDIMTWGIR  |                       |
| CAR_human     | 149 | -----PTLAPVPLVTHFADINTFMVL                                   |                       |

|             |     |                                                              |                       |                       |  |
|-------------|-----|--------------------------------------------------------------|-----------------------|-----------------------|--|
|             |     | <u><b>Helix-3</b></u>                                        | <u><b>Helix-4</b></u> | <u><b>Helix-5</b></u> |  |
| PXR_human   | 253 | GIISFAKVISYFRDLPIEDQISLLKGAAFELCQLRFNTVFNAET-GTWECGR--LSY--- |                       |                       |  |
| PXR_chicken |     | QVIKFAKEIPAFRGLPIDDQISLLKCATLGICQIQFNTVFNEET-NAWECGQ--HCF--- |                       |                       |  |

|               |     |                                                                   |
|---------------|-----|-------------------------------------------------------------------|
| PXR_fugu      |     | DI IAFSKSLTDFKSL LIGDQ IALLKGATFEVMEIRFNMVFNTKT-GLWECGH--ATY---   |
| VDR_human     | 240 | KVIGFAKMIPGFRDLTSEDQIVLLKSSAIEVIMLRSNESFTMDD-MSWTCGNQDYKY---      |
| VDR_mouse     |     | KVIGFAKMIPGFRDLTSDQIVLLKSSAIEVIMLRSNQSFTMDD-MSWDCGSQDYKY---       |
| VDR_x_laevis  |     | KIIGFAKMIPGFRDLIAEDQ IALLKSSVIEVIMLRSNQSFSLDD-MSWTCGSEDFKYKVD     |
| VDR_zebrafish |     | KVIGFAKMIPGFRDLTAEDQ IALLKSSAIEIIMLRSNQSFSLED-MSWSCGGPDFKYCIN     |
| VDR_lamprey   |     | KVIGFAKMIPGFKELCTEDQISLLKASAIEIIILRSNESFTMED-NSWTCGSNEFKYQIG      |
| VDR_PXR_Ciona |     | KVIDYCKGIPQFVQLSIVDQIVLLRGGCLEMLVLRSYFAFSCNE-NKYMSDK--FQY---      |
| CAR_human     | 171 | QVIKFTKDLPVFRSLPIEDQISLLKGAAVEICHIVLNTTFCLOT-QNFLCGP--LRY---      |
|               |     | <u>Helix-7</u> <u>Helix-8</u> <u>Helix-9</u>                      |
| PXR_human     | 308 | CLEDT-AGGF----QQLLLEPMLKFHYMLKKLQLHEEEYVLMQAI SLFSPDRPGVLQHRV     |
| PXR_chicken   |     | TIKDGALAGF----QIYLEPLLKFHISLKKLRLHEAEYVLLVAMLLFSPDHASVTQRDF       |
| PXR_fugu      |     | CIEDAVRAGF----QPLFLEPLLKFHHTLRNLGLEEEYVLMQALS LFS PDRPGVQQHSV     |
| VDR_human     | 297 | RVSDVTKAGH----SLELIEPLIKFQVGLKKNLHHEEHVLLMAICIVSPDRPGVQDAAL       |
| VDR_mouse     |     | DITDVSRAGH----TLELIEPLIKFQVGLKKNLHHEEHVLLMAICIVSPDRPGVQDAKL       |
| VDR_x_laevis  |     | D---VTQAGH----NMELLEPLVKFQVGLKKNLHHEEHVLLMAICILSPDRPGLQDKAL       |
| VDR_zebrafish |     | D---VTKAGH----TLELLEPLVKFQVGLKKNLHHEEHVLLMAICLLSPDRPGVDHVR        |
| VDR_lamprey   |     | D---VMQAGH----KLELLEPLVKFQVNMKKDLHHEEHVLLMAICLFS PDRPGVQDRCR      |
| VDR_PXR_Ciona |     | KPSDFLQAGG----NKEFVEKYNSLHIRMRKMKLQVEEICLLLALVLFSPDRPGLEDQAK      |
| CAR_human     | 226 | TIEDGARVGF----QVEFLELLFHFGHTLRKLQLQEPEYVLLAAMALFSPDRPGVTQRDE      |
|               |     | <u>Helix-9</u> <u>Helix-10</u>                                    |
| PXR_human     | 363 | IDQLQEQAIFAITLKS YIECNR-PQPAHRFLFLKIMAMLTELRSINAQHTQRLRLRIQDIHPFA |
| PXR_chicken   |     | VDQLQEKVALTLKSYIDHRH-PMPEGRFLYAKLLLLLTELQTLKMENTRQILHIQDLSSM-     |
| PXR_fugu      |     | IDKIHENLALALKTRIELKR-TGPEKHMLYPKVL SCLTEMRTMNEEYSKQVLQIQDIPNV     |
| VDR_human     | 353 | IEAIQDRLSNTLQTYIRCRH-PPPGSHLLYAKMIQKLADLRSLNEEHSKQYRCLSFQPECS     |
| VDR_mouse     |     | VEAIQDRLSNTLQTYIRCRH-PPPGSHQLYAKMIQKLADLRSLNEEHSKQYRSLSFQPECS     |
| VDR_x_laevis  |     | VESIQDRLSSTLQTYILCKH-PPPGSRLLYAKMIQKLADLRSLNEEHSKQYRSISFLPEHS     |
| VDR_zebrafish |     | IEALQDRLCDVLAQYIRIQH-P--GGRLLYAKMIQKLADLRSLNEEHSKQYRSLSFQPEHS     |
| VDR_lamprey   |     | IEEVQEHLTETLRAYIACRH-PLSCKHMLYTKMVEKLTTELRS LNEEHSKQYLQISQDAV NK  |
| VDR_PXR_Ciona |     | VEQMQDCVANTLQAYEYTHK-PPNESSFLQARTMYCLPILRTINMLFAQNIMSLQTNKDM      |
| CAR_human     | 282 | VDQLQEEMALTLQSYIKGQQ-RRPRDRFLYAKLLGLLAELRSINEAYGYQIQHIQGLSAMM     |
| PXR_human     | 422 | ATPLMQELFGITGS                                                    |
| PXR_chicken   |     | -TPLLSEIIS                                                        |
| PXR_fugu      |     | VIPPLLMEMVS                                                       |
| VDR_human     | 412 | SMKLTPLVLEVFGNEIS                                                 |
| VDR_mouse     |     | SMKLTPLVLEVFGNEIS                                                 |
| VDR_x_laevis  |     | SMKLTPLMLEVFSDEIP                                                 |
| VDR_zebrafish |     | SMQLTPLVLEVFGSEVS                                                 |
| VDR_lamprey   |     | KEDLPPLLEVFGNPTA                                                  |
| VDR_PXR_Ciona |     | N-PLILEVNNSADDED                                                  |
| CAR_human     | 341 | MPLLQEICS                                                         |

Additional file 1: Sequence alignment of (A) DNA-binding domain and (B) ligand-binding domain of three PXR, five VDR, *Ciona intestinalis* VDR/PXR, and human CAR. The ligand-binding domain is annotated with the  $\alpha$ -helices [1]. Accession numbers are: human PXR [Genbank:AF061056], chicken PXR [Genbank:AF276753], takifugu PXR [Ensembl,<http://www.ensembl.org:NEWSINFRUT00000171584>], human VDR [Genbank:NM\_00376], mouse VDR [Genbank:NM\_008504], *Xenopus laevis* VDR [Genbank:U91849], zebrafish VDR [Genbank:AF164512], sea lamprey VDR [Genbank:AY249863], *Ciona intestinalis* VDR/PXR [Genbank:BR000137], and human

CAR [Genbank:NM\_005122]. Note that some N-terminal sequence is unavailable for the *Ciona* VDR/PXR.

## Reference

1. Moore LB, Maglich JM, McKee DD, Wisely B, Willson TM, Kliewer SA, Lambert MH, Moore JT: **Pregnane X receptor (PXR), constitutive androstane receptor (CAR), and benzoate X receptor (BXR) define three pharmacologically distinct classes of nuclear receptors.** *Mol Endocrinol* 2002, **16**:977-986.
